# Supplementary material for: Burden of Hospital Admission and Repeat Angiography in Angina Pectoris Patients with and without Coronary Artery Disease: A Registry-Based Cohort Study
Source: PLoS One. 2014 Apr 4;9(4):e93170. doi: 10.1371/journal.pone.0093170 (PMC3976412; doi:10.1371/journal.pone.0093170)
Supplement: Table S1 — Event rates and hazard ratios (95% confidence intervals) by major cardiovascular end-point, study population group and sex in successively adjusted recurrent event models. (DOCX) [file pone.0093170.s002.docx]

Table S1.

VD: vessel disease. MI: myocardial infarction.

aAdjusted for age.

bAdjusted for age, body mass index, diabetes, active smoking, use of antihypertensive medication and lipid lowering medication, respectively and stratified by sex (no interaction).

cLimited to time from one year post-inclusion onwards, adjusted as Model 2 and stratified by sex (no interaction).

dFurther limited to individuals with no diagnosis of aortic stenosis, atrial flutter, paroxysmal atrial fibrillation, hypertrophic cardiomyopathy, or perimyocarditis previously or within 6 months of inclusion and for the symptomatic population a left ventricular ejection fraction ≥40. Adjusted as Model 2 and stratified by sex (no interaction).

‡P<0.05 indicates interaction with sex and estimates from these models should be interpreted with caution.

†Angina comprises the following ICD-10 codes: I20.1, I20.8, I20.9, I25.1 and I25.9.

*P<0.001; $P<0.01; §P<0.05; ‡P<0.05 indicates interaction with sex and estimates from these models should be interpreted with caution.

| Table S1. Event rates and hazard ratios (95% confidence intervals) by major cardiovascular end-point, study population group and sex in successively adjusted recurrent event models | | | | | | | |
| --- | --- | --- | --- | --- | --- | --- | --- |
|  | Events; event rates per 1000 years of follow-up | | Model 1a | | Model 2b | Model 3c | Model 4d | |
| **End-point** | Women | Men | Women | Men | Pooled data | Pooled data | Pooled | |
| Study population group | n=8,050 | n=8,868 | n=8,050 | n=8,868 | n=16,918 | n=16,592 | n=10,115 | |
| **MI** |  |  |  |  |  |  |  | |
| Reference | 55; 2(2–3) | 79; 4(3–6) | (Reference) | (Reference) | (Reference) | (Reference) | (Reference) | |
| Angiographically normal | 24; 2(1–3) | 20; 3(2–5) | 1.3(0.7–2.2) | 0.7(0.4–1.2) | 0.8(0.5–1.2) | 0.8(0.5–1.2) | 0.7(0.4–1.3) | |
| Angiographically diffuse | 37; 9(6–14) | 49; 11(8–16) | 4.7(2.8–7.7)* | 2.3(1.5–3.5)* | 2.4(1.5–3.7)* | 2.9(2.0–4.3)* | 2.4(1.4–4.1)$ | |
| 1VD | 60; 13(10–20) | 113; 13(11–16) |  |  |  | 3.0(2.1–4.4)* | 2.5(1.5–4.0)* | |
| 2VD | 32; 14(10–22) | 93; 15(12–19) |  |  |  | 2.5(1.7–3.6)* | 1.9(1.1–3.0)§ | |
| 3VD | 54; 19(14–28) | 162; 15(13–19) |  |  |  | 2.3(1.5–3.4)* | 1.6(1.0–2.6)§ | |
| **Unstable angina** |  |  |  |  |  |  |  | |
| Reference | 23; 1(1–1) | 21; 1(1–2) | (Reference) | (Reference) | (Reference) | (Reference) | (Reference) | |
| Angiographically normal | 25; 2(1–3) | 21; 3(2–6) | 2.4(1.1–5.0)§ | 3.0(1.4–6.1)$ | 1.7(0.9–3.1) | 1.8(1.0–3.1)§ | 2.3(1.2–4.4)§ | |
| Angiographically diffuse | 34; 8(6–13) | 40; 9(7–13) | 9.7(4.7–19.7)* | 8.7(4.5–16.9)* | 4.9(2.6–9.2)* | 5.2(3.0–9.0)* | 5.2(2.8–10.0)* | |
| 1VD | 105; 23(18–30) | 166; 19(16–24) |  |  |  | 7.4(4.4–12.5)* | 5.8(3.1–10.7)* | |
| 2VD | 55; 24(17–36) | 129; 20(17–25) |  |  |  | 6.0(3.5–10.4)* | 5.1(2.7–9.6)* | |
| 3VD | 70; 25(18–36) | 155; 11(12–18) |  |  |  | 5.2(2.8–9.6)* | 4.7(2.5–9.1)* | |
| **Angina†** |  |  |  |  |  |  |  | |
| Reference | 69; 3(2–4) | 122; 7(5–8) | (Reference) | (Reference) | (Reference) | (Reference) | (Reference) | |
| Angiographically normal | 245; 19(14–27) | 148; 22(15–32) | 8.3(5.4–12.8)* | 3.4(2.3–5.3)* | 4.9(3.3–7.3)* | 4.5(3.2–6.5)* | 5.8(3.6–9.3)* | |
| Angiographically diffuse | 180; 45(36–57) | 231; 53(45–65) | 17.9(11.7–27.4)* | 7.4(5.4–10.2)* | 10.2(7.0–14.9)* | 9.7(7.2–13.1)* | 9.8(6.7–14.2)* | |
| 1VD | 1001; 224(206–244) | 1721; 201(188–215) |  |  | ‡ (P<0.01) | 18.5(13.9–24.6)* | 18.8(13.4–26.3)* | |
| 2VD | 544; 241(127–267) | 1485; 235(222–248) |  |  |  | 17.2(12.9–23.0)* | 17.4(12.3–24.4)* | |
| 3VD | 690; 248(226–273) | 2458; 233(223–244) |  |  |  | 15.3(11.3–20.7)* | 15.8(11.1–22.5)* | |
|  |  |  |  |  |  | ‡ (P<0.001) | ‡ (P<0.001) | |
| **Heart failure** |  |  |  |  |  |  |  | |
| Reference | 71; 3(2–4) | 65; 4(2–5) | (Reference) | (Reference) | (Reference) | (Reference) | (Reference) | |
| Angiographically normal | 83; 7(5–9) | 153; 23(14–38) | 3.6(2.3–5.6)* | 7.2(4.1–12.6)* | 6.0(3.9–9.2)* | 6.3(3.9–10.3)* | 3.2(1.6–6.0)$ | |
| Angiographically diffuse | 32; 8(5–15) | 108; 25(18–37) | 3.1(1.7–5.7)* | 6.1(3.7–10.2)* | 5.7(3.7–8.6)* | 6.2(3.9–9.8)* | 3.8(1.9–7.5)* | |
| 1VD | 46; 10(7–16) | 121; 14(10–20) | 4.1(2.5–6.8)* | 3.5(2.1–5.8)* | 4.3(3.0–6.3)* | 4.1(2.7–6.2)* | 2.1(1.1–4.2)* | |
| 2VD | 47; 21(14–33) | 88; 14(10–19) | 6.9(4.1–11.6)* | 3.2(2.0–5.1)* | 4.5(3.1–6.5)* | 4.6(3.0–6.9)* | 3.8(2.2–6.7)* | |
| 3VD | 42; 15(9–26) | 228; 21(17–27) | 4.2(2.4–7.4)* | 4.6(3.0–7.0)* | 5.2(3.6–7.4)* | 4.4(3.0–6.6)* | 3.1(1.7–5.9)* | |
|  |  |  |  |  | ‡ (P<0.01) | ‡ (P<0.01) | ‡ (P=0.4) | |
| **Stroke** |  |  |  |  |  |  |  | |
| Reference | 104; 4(3–5) | 67; 4(3–5) | (Reference) | (Reference) | (Reference) | (Reference) | (Reference) | |
| Angiographically normal | 62; 5(4–7) | 47; 7(5–10) | 1.6(1.1–2.3)§ | 2.1(1.4–3.2)* | 1.8(1.3–2.4)* | 1.7(1.2–2.3)$ | 2.2(1.5–3.3)* | |
| Angiographically diffuse | 35; 9(6–13) | 38; 9(6–13) | 2.0(1.3–3.2)$ | 2.1(1.3–3.3)$ | 1.9(1.4–2.7)* | 2.0(1.4–2.9)* | 2.0(1.2–3.2)$ | |
| 1VD | 31; 7(5–11) | 52; 6(5–8) | 1.6(1.0–2.6)§ | 1.5(1.0–2.2) | 1.4(1.0–2.0)§ | 1.4(0.9–2.0) | 1.5(1.0–2.2) | |
| 2VD | 12; 5(3–11) | 48; 8(6–10) | 1.0(0.5–2.0) | 1.7(1.2–2.6)$ | 1.4(1.0–2.0) | 1.3(0.9–1.9) | 1.4(0.9–2.1) | |
| 3VD | 27; 10(7–15) | 150; 14(12–17) | 1.7(1.1–2.7)§ | 3.0(2.2–4.2)* | 2.4(1.8–3.2)* | 2.1(1.5–2.8)* | 2.4(1.7–3.5)* | |
